# Supplementary material
Source: Springer Nature journal article supplement (https://www.springermedizin.de/resource/supplementary/12911_2013_782_MOESM4_ESM.pdf/9526780)

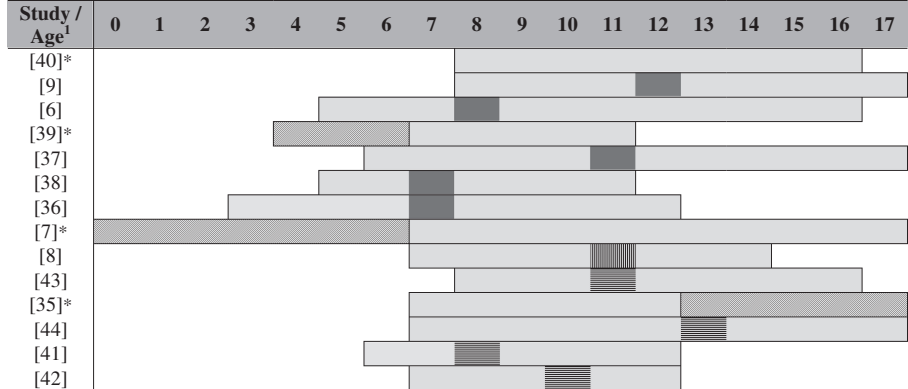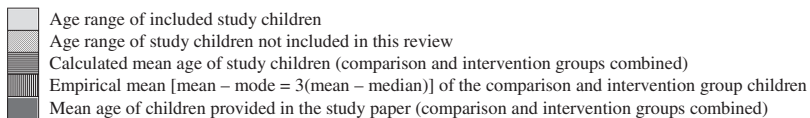

\* Mean age not reported and could not be calculated from study data provided

Supplement: MOESM4 [file 9526780]
